# Supplementary material for: Prognostic significance of CTNNB1 mutation in hepatocellular carcinoma: a systematic review and meta-analysis
Source: publisher site journal article supplement (doi:10.18632/aging.205047), 2023-09-20
Supplement: Supplementary file [file aging-v15i18-205047-supplementary-material-SD1.pdf]

SUPPLEMENTARY FIGURES

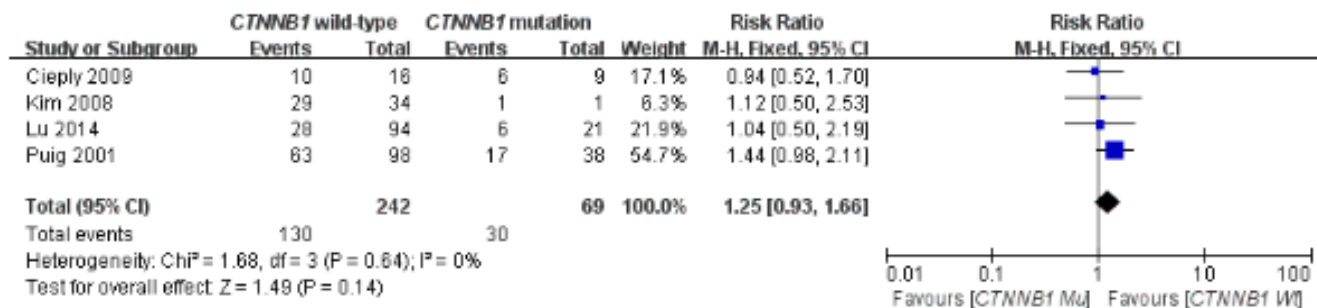

Supplementary Figure 1. Forest plot of odds ratio for the association of CTNNB1 mutation with metastasis.

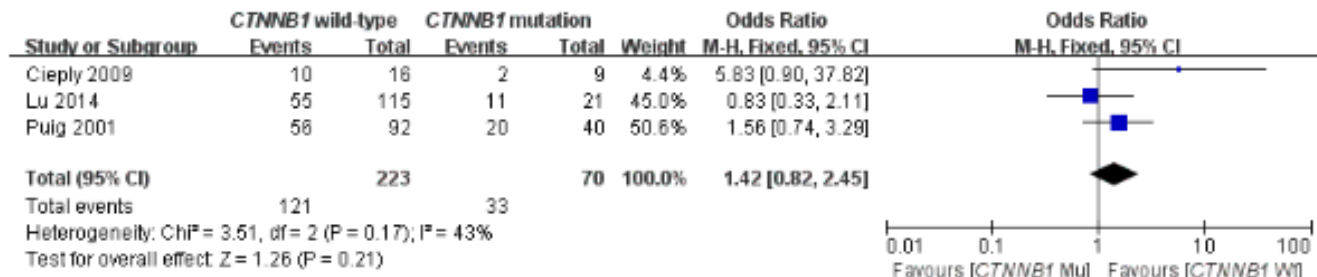

Supplementary Figure 2. Forest plot of odds ratio for the association of CTNNB1 mutation with vascular invasion.

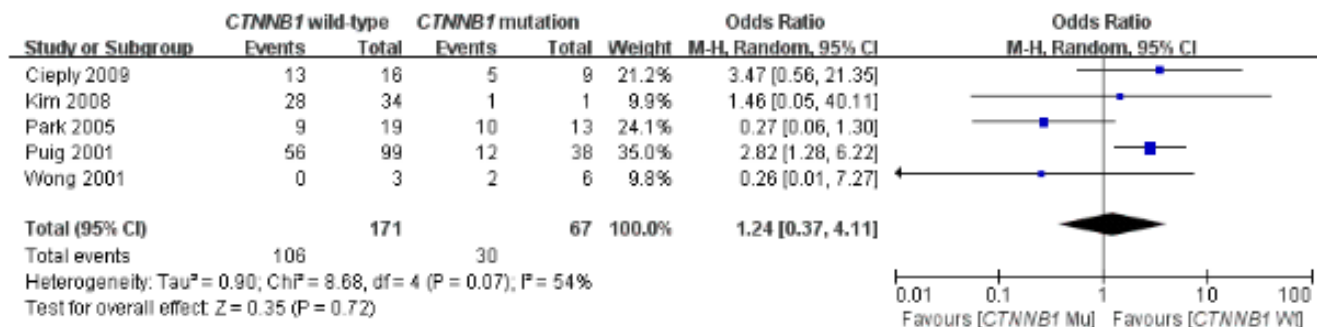

Supplementary Figure 3. Forest plot of odds ratio for the association of CTNNB1 mutation with tumor size.

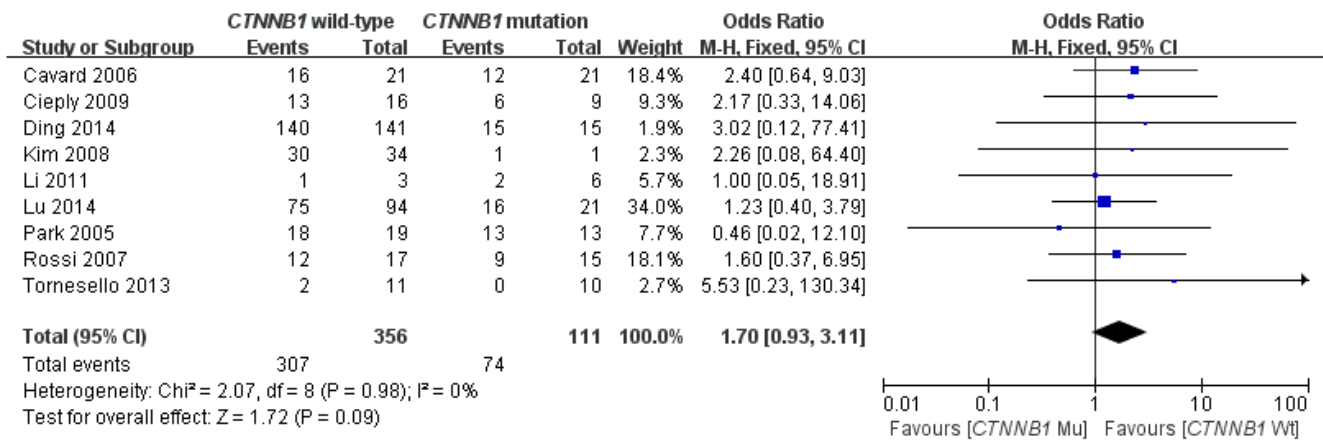

Supplementary Figure 4. Forest plot of odds ratio for the association of CTNNB1 mutation with etiology (HCV).

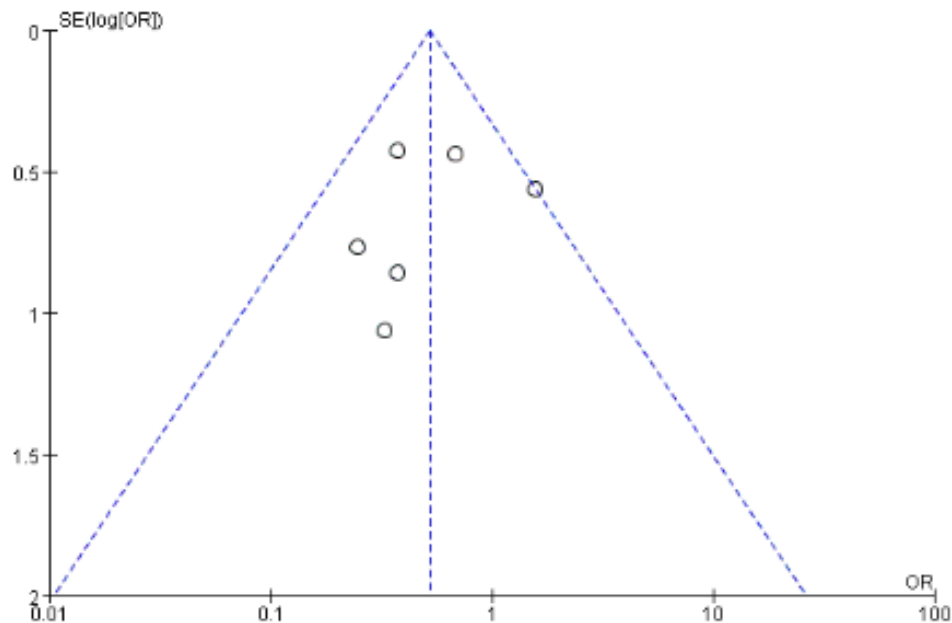

Supplementary Figure 5. Funnel plot to assess publication bias. Begg's publication bias plot showed no publication bias for studies regarding CTNNB1 mutation and 1-year overall survival (OS) in the meta-analysis.

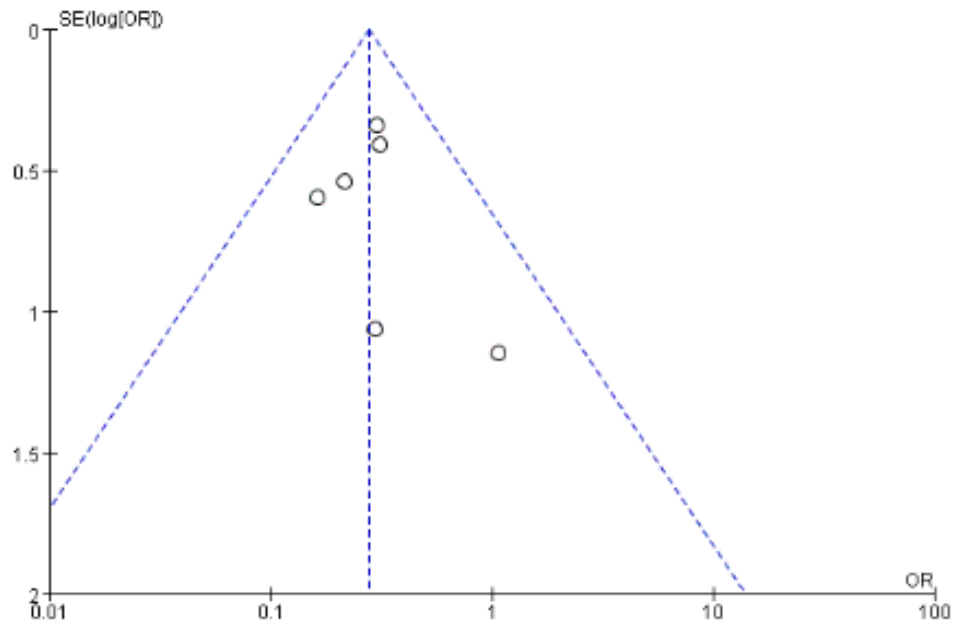

**Supplementary Figure 6. Funnel plot to assess publication bias.** Begg's publication bias plot showed no publication bias for studies regarding *CTNNB1* mutation and 3-year overall survival (OS) in the meta-analysis.

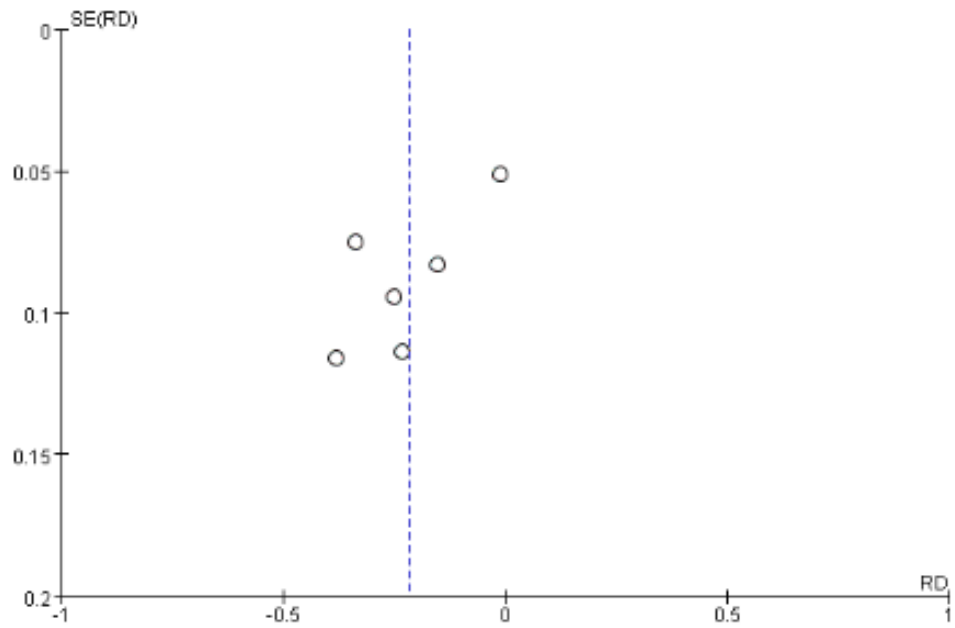

**Supplementary Figure 7. Funnel plot to assess publication bias.** Begg's publication bias plot showed no publication bias for studies regarding *CTNNB1* mutation and 5-year overall survival (OS) in the meta-analysis.

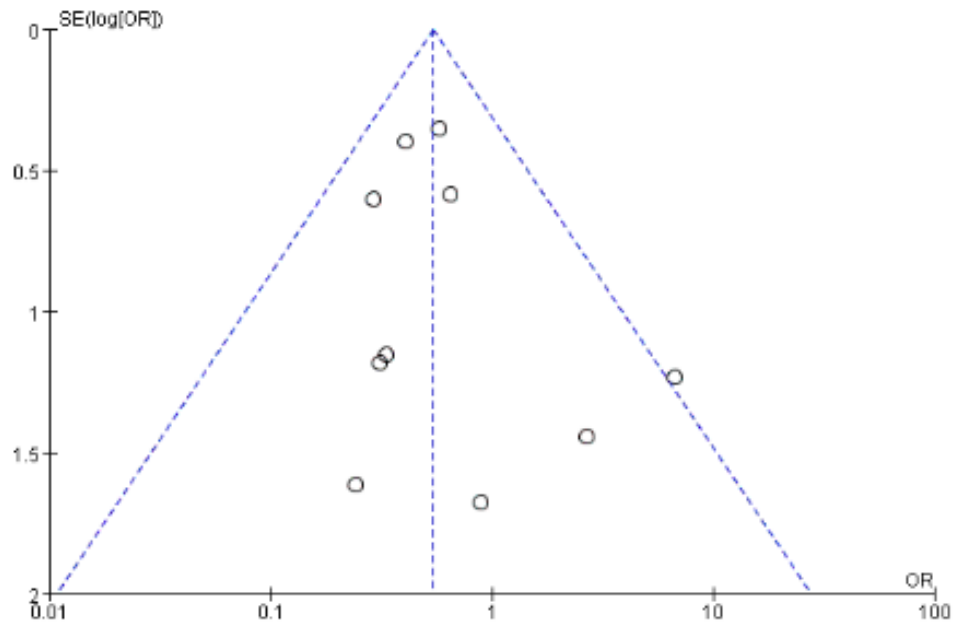

**Supplementary Figure 8. Funnel plot to assess publication bias.** Begg's publication bias plot showed no publication bias for studies regarding *CTNNB1* mutation and differentiation grade in the meta-analysis.

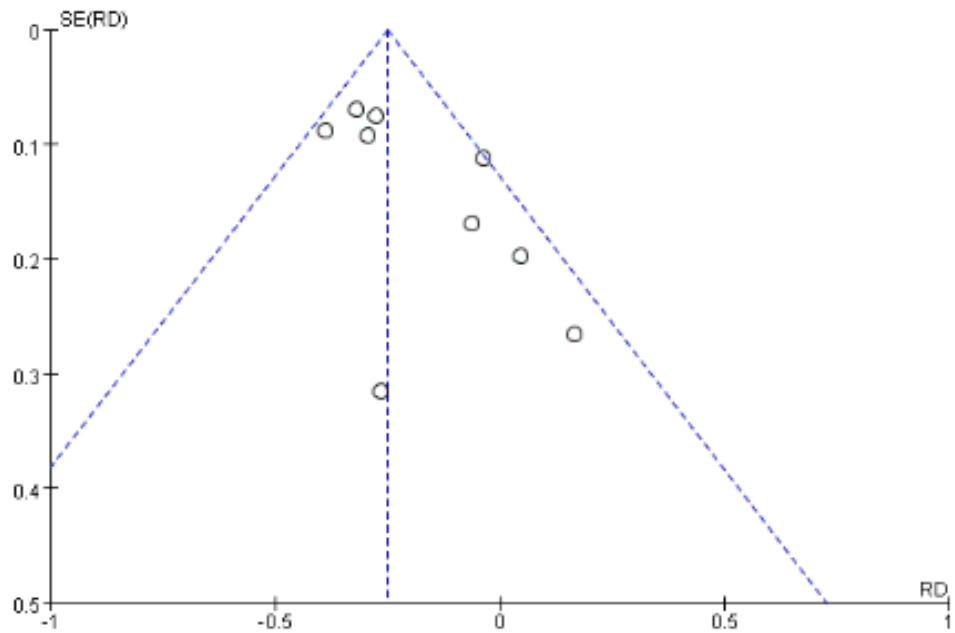

**Supplementary Figure 9. Funnel plot to assess publication bias.** Begg's publication bias plot showed no publication bias for studies regarding *CTNNB1* mutation and TNM stages in the meta-analysis.

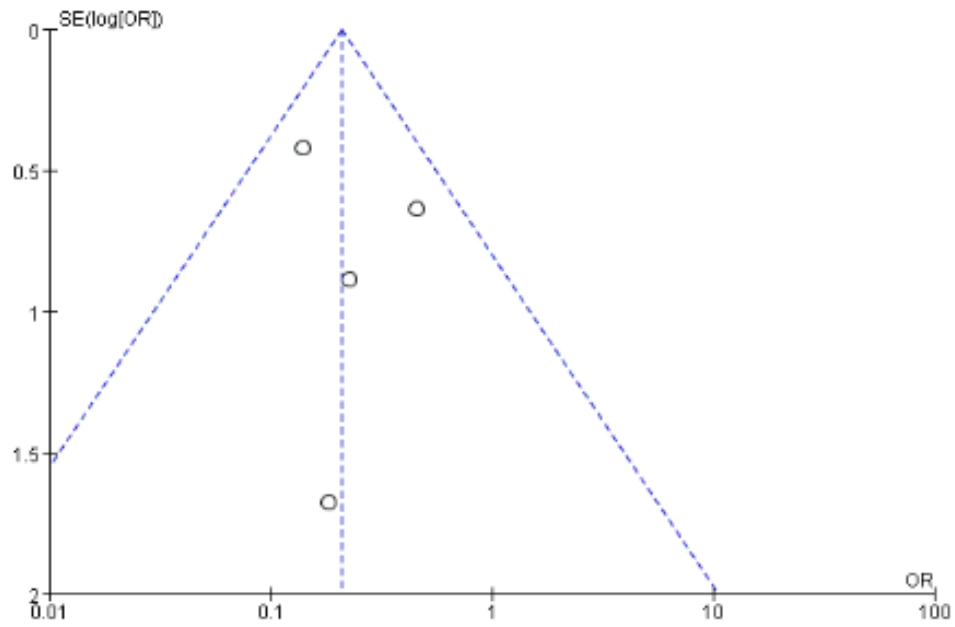

**Supplementary Figure 10. Funnel plot to assess publication bias.** Begg's publication bias plot showed no publication bias for studies regarding *CTNNB1* mutation and liver cirrhosis in the meta-analysis.

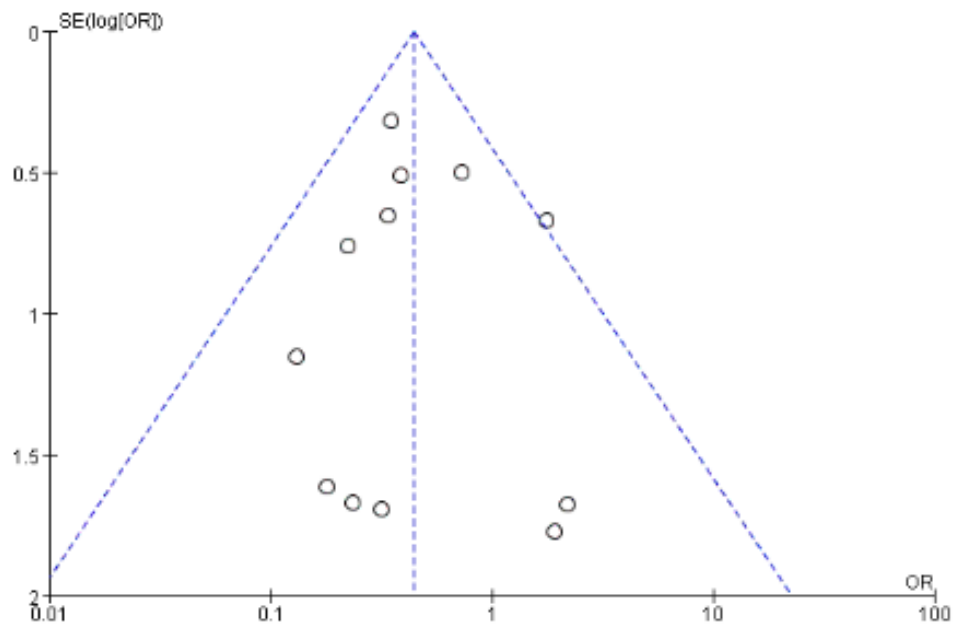

**Supplementary Figure 11. Funnel plot to assess publication bias.** Begg's publication bias plot showed no publication bias for studies regarding *CTNNB1* mutation and etiology (HBV) in the meta-analysis.

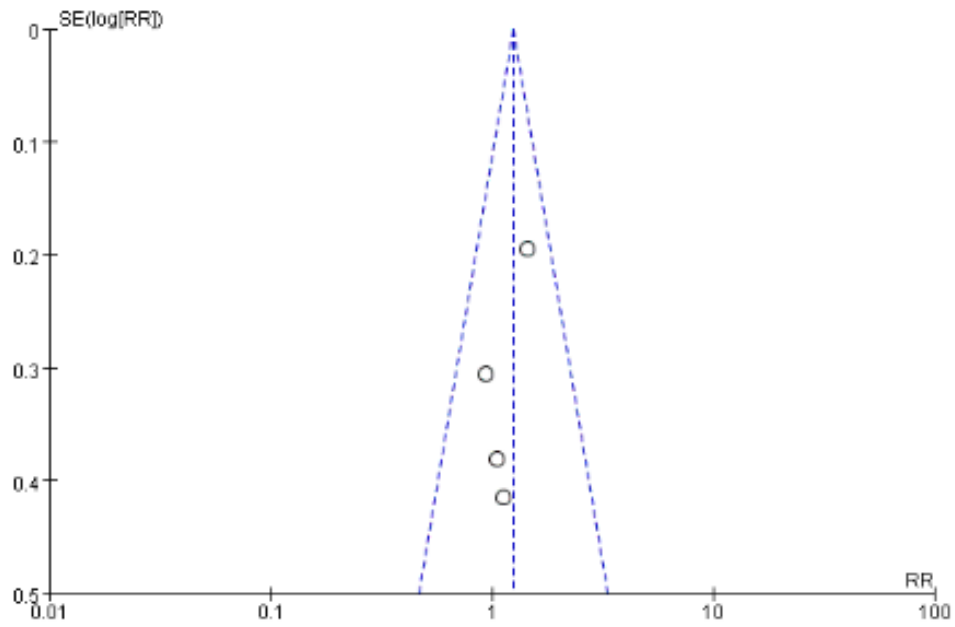

**Supplementary Figure 12. Funnel plot to assess publication bias.** Begg’s publication bias plot showed no publication bias for studies regarding *CTNNB1* mutation and metastasis in the meta-analysis.

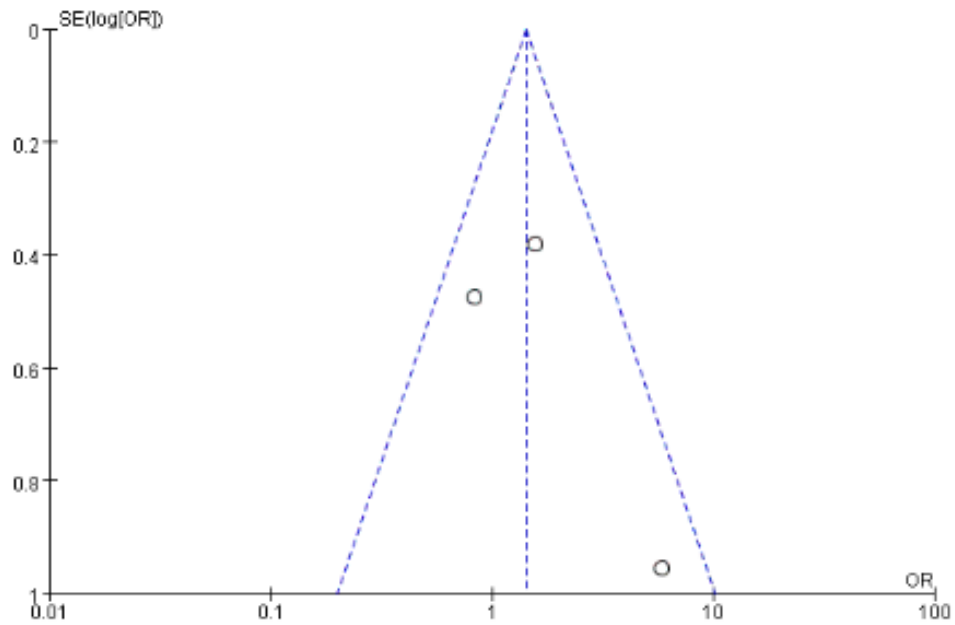

**Supplementary Figure 13. Funnel plot to assess publication bias.** Begg’s publication bias plot showed no publication bias for studies regarding *CTNNB1* mutation and vascular invasion in the meta-analysis.

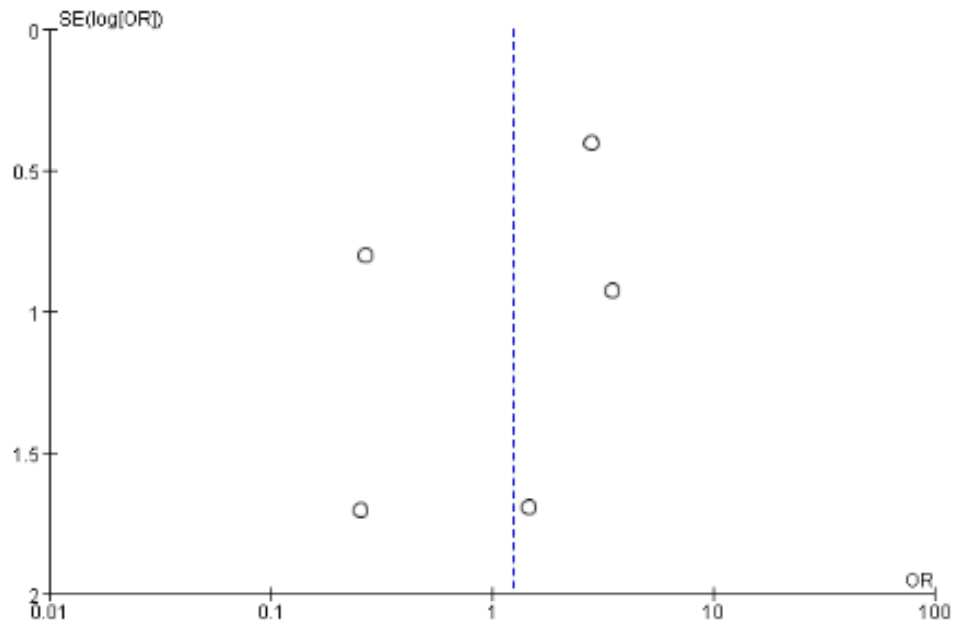

**Supplementary Figure 14. Funnel plot to assess publication bias.** Begg’s publication bias plot showed no publication bias for studies regarding *CTNNB1* mutation and tumor size in the meta-analysis.

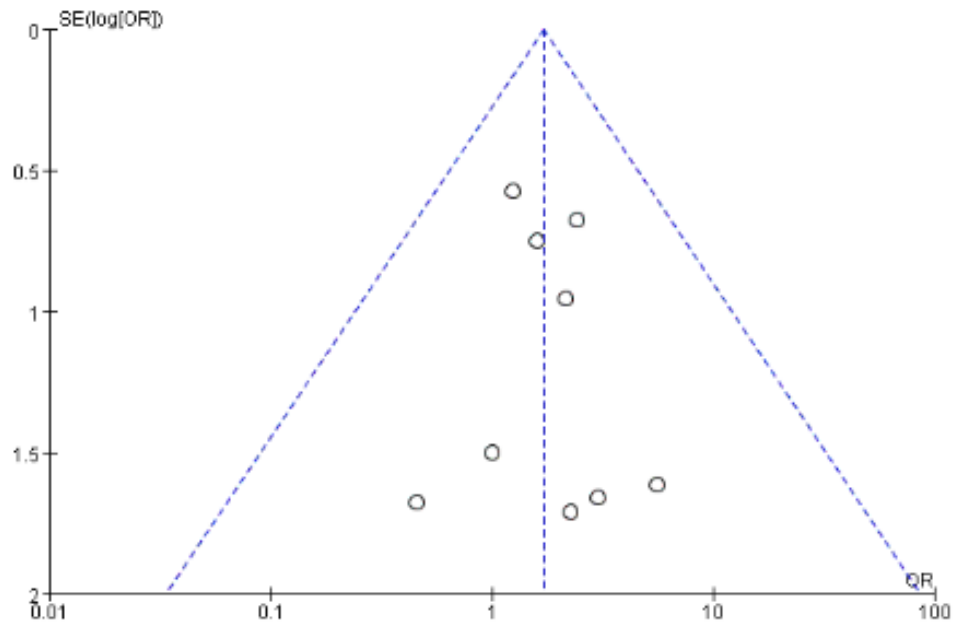

**Supplementary Figure 15. Funnel plot to assess publication bias.** Begg’s publication bias plot showed no publication bias for studies regarding *CTNNB1* mutation and HCV in the meta-analysis.
